# Supplementary material for: Exploring the size dependence of cyclic and acyclic π-systems on cation–π binding
Source: Royal Society of Chemistry journal article supplement (doi:10.1039/b713703f), 2008-01-01
Supplement: b713703f.pdf [file b713703f.pdf]

## Exploring the size dependence of cyclic and acyclic $\pi$ -systems on cation $-\pi$ binding ‡

Dolly Vijay and G. Narahari Sastry\*

Molecular Modeling group, Indian Institute of Chemical Technology, Tarnaka,  
Hyderabad - 500 007, India; [gnsastry@yahoo.com](mailto:gnsastry@yahoo.com)

### **Supporting Information**

(22 pages including this page)

**Table S1:** The MP2(FULL) interaction energy (IE) and the charges on the metal ions of the various acyclic conjugated  $\pi$  systems with  $\text{Li}^+$  and  $\text{Mg}^{2+}$  cations calculated in conjugation with 6-31G\* basis sets.

**Table S2:** The MP2(FULL) interaction energy (IE) and the charges on the metal ions of the various cyclic conjugated  $\pi$  systems with  $\text{Li}^+$  and  $\text{Mg}^{2+}$  cations calculated in conjugation with 6-31G\* basis sets.

**Table S3:** The MP2(FULL)/6-31G\* optimized cartesian coordinates of the acyclic  $\text{Li}^+$  complexes considered in the study.

**Table S4:** The MP2(FULL)/6-31G\* optimized cartesian coordinates of the cyclic  $\text{Li}^+$  complexes considered in the study.

**Table S5:** The MP2(FULL)/6-31G\* optimized cartesian coordinates of the acyclic  $\text{Mg}^{2+}$  complexes considered in the study.

**Table S6:** The MP2(FULL)/6-31G\* optimized cartesian coordinates of the cyclic  $\text{Mg}^{2+}$  complexes considered in the study.

**Table S7:** The total energy of the  $\text{Li}^+$  and  $\text{Mg}^{2+}$  complexes of the acyclic systems at the MP2(FULL)/6-311++G\*\* level.

**Table S8:** The total energy of the  $\text{Li}^+$  and  $\text{Mg}^{2+}$  complexes of the cyclic systems at the MP2(FULL)/6-311++G\*\* level.

**Table S9:** The MP2(FULL)/cc-pVDZ //MP2(FULL)/6-31G\* charges (in au) on the  $\text{Li}^+$  and  $\text{Mg}^{2+}$  ions in the various acyclic complexes considered in the study.

**Table S10:** The MP2(FULL)/cc-pVDZ //MP2(FULL)/6-31G\* charges (in au) on the  $\text{Li}^+$  and  $\text{Mg}^{2+}$  ions in the various cyclic complexes considered in the study.

**Table S1:** The MP2(FULL) interaction energy (IE) and the charges on the metal ions of the various acyclic conjugated  $\pi$  systems with  $\text{Li}^+$  and  $\text{Mg}^{2+}$  cations calculated in conjugation with 6-31G\* basis sets.

| $\pi$ -system | IE(kcal/mol)  |                  | Charges (amu) |                  |
|---------------|---------------|------------------|---------------|------------------|
|               | $\text{Li}^+$ | $\text{Mg}^{2+}$ | $\text{Li}^+$ | $\text{Mg}^{2+}$ |
| <b>1</b>      | -21.12        | -71.73           | 0.728         | 1.369            |
| <b>2</b>      | -28.56        | -95.58           | 0.623         | 1.162            |
| <b>3a</b>     | -28.74        | -103.00          | 0.664         | 1.199            |
| <b>3b</b>     | -31.54        | -111.54          | 0.609         | 1.134            |
| <b>4a</b>     | -33.59        | -120.24          | 0.604         | 1.126            |
| <b>4b</b>     | -33.83        | -126.87          | 0.596         | 1.072            |
| <b>5</b>      | -28.91        | -96.00           | 0.590         | 1.137            |
| <b>6</b>      | -31.94        | -110.41          | 0.589         | 1.128            |
| <b>7a</b>     | -33.19        | -117.36          | 0.580         | 1.087            |
| <b>7b</b>     | -33.17        | -123.88          | 0.573         | 1.077            |
| <b>8a</b>     | -31.30        | -109.31          | 0.613         | 1.145            |
| <b>9a</b>     | -33.51        | -119.12          | 0.606         | 1.126            |
| <b>9b</b>     | -33.52        | -125.14          | 0.599         | 1.075            |
| <b>10a</b>    | -33.43        | -117.83          | 0.608         | 1.135            |
| <b>8b</b>     | -32.30        | -112.49          | 0.584         | 1.124            |
| <b>9c</b>     | -34.83        | -128.16          | 0.570         | 1.077            |

Electronic Supplementary Material for PCCP  
 This journal is © The Owner Societies 2008

|            |        |         |       |       |
|------------|--------|---------|-------|-------|
| <b>10b</b> | -34.52 | -126.50 | 0.573 | 1.079 |
| <b>11</b>  | -38.80 | -129.06 | 0.505 | 1.016 |
| <b>12a</b> | -39.96 | -140.04 | 0.490 | 0.934 |
| <b>13</b>  | -41.90 | -132.08 | 0.464 | 1.119 |
| <b>12b</b> | -33.23 | -118.50 | 0.602 | 1.100 |
| <b>14</b>  | -49.03 | -153.33 | 0.374 | 0.710 |

**Table S2:** The MP2(FULL) interaction energy (IE) and the charges on the metal ions of the various cyclic conjugated  $\pi$  systems with  $\text{Li}^+$  and  $\text{Mg}^{2+}$  cations calculated in conjugation with 6-31G\* basis sets.

| $\pi$ -system | IE(kcal/mol)  |                  | Charges (amu) |                  |
|---------------|---------------|------------------|---------------|------------------|
|               | $\text{Li}^+$ | $\text{Mg}^{2+}$ | $\text{Li}^+$ | $\text{Mg}^{2+}$ |
| <b>15</b>     | -30.03        | -95.24           | 0.611         | 1.207            |
| <b>16</b>     | -37.46        | -114.20          | 0.487         | 0.971            |
| <b>17</b>     | -23.62        | -113.19          | 0.551         | 0.905            |
| <b>18</b>     | -40.25        | -130.30          | 0.507         | 0.953            |
| <b>19a</b>    | -42.52        | -142.26          | 0.506         | 0.933            |
| <b>19b</b>    | -42.01        | -141.20          | 0.525         | 0.946            |
| <b>20a</b>    | -42.76        | -139.98          | 0.500         | 0.922            |
| <b>20b</b>    | -41.82        | -141.99          | 0.541         | 0.965            |
| <b>21a</b>    | -44.14        | -150.52          | 0.504         | 0.919            |
| <b>21b</b>    | -43.81        | -150.63          | 0.524         | 0.930            |

**Table S3:** The MP2(FULL)/6-31G\* optimized cartesian coordinates of the acyclic Li<sup>+</sup> complexes considered in the study.

| <b>1</b>  |           |           |           | <b>3</b>  |           |           |           |
|-----------|-----------|-----------|-----------|-----------|-----------|-----------|-----------|
| 6         | 0.000000  | 0.674449  | -0.353735 | 1         | -0.614947 | -3.959242 | 0.033041  |
| 1         | -0.927274 | 1.241674  | -0.401175 | 3         | 0.000000  | 0.000000  | 1.942528  |
| 1         | 0.927274  | 1.241674  | -0.401175 | <hr/>     |           |           |           |
| 6         | 0.000000  | -0.674449 | -0.353735 | <b>3b</b> |           |           |           |
| 1         | 0.927274  | -1.241674 | -0.401175 | 6         | 2.986287  | -0.125480 | -0.126830 |
| 1         | -0.927274 | -1.241674 | -0.401175 | 1         | 3.893725  | 0.468766  | -0.112079 |
| 3         | 0.000000  | 0.000000  | 1.949839  | 1         | 3.108121  | -1.208321 | -0.129579 |
| <hr/>     |           |           |           | 6         | 1.766956  | 0.452836  | -0.245785 |
| <b>2</b>  |           |           |           | 1         | 1.696651  | 1.541069  | -0.302278 |
| 6         | 0.000000  | 1.846576  | -0.090687 | 3         | 1.324563  | -0.216791 | 1.831642  |
| 1         | -0.681246 | 2.691025  | -0.085936 | 6         | 0.514151  | -0.301460 | -0.262851 |
| 1         | 1.061661  | 2.071043  | 0.000796  | 1         | 0.572553  | -1.375407 | -0.462743 |
| 6         | -0.444696 | 0.585464  | -0.286512 | 6         | -0.705708 | 0.277977  | -0.077506 |
| 1         | -1.511433 | 0.405206  | -0.433832 | 1         | -0.756295 | 1.361745  | 0.061347  |
| 6         | 0.444696  | -0.585464 | -0.286512 | 6         | -1.965169 | -0.432658 | -0.103474 |
| 1         | 1.511433  | -0.405206 | -0.433832 | 1         | -1.941513 | -1.505658 | -0.285263 |
| 6         | 0.000000  | -1.846576 | -0.090687 | 6         | -3.141588 | 0.200513  | 0.063199  |
| 1         | 0.681246  | -2.691025 | -0.085936 | 1         | -3.193085 | 1.272899  | 0.230435  |
| 1         | -1.061661 | -2.071043 | 0.000796  | 1         | -4.083424 | -0.335095 | 0.024712  |
| 3         | 0.000000  | 0.000000  | 1.854776  | <hr/>     |           |           |           |
| <hr/>     |           |           |           | <b>4a</b> |           |           |           |
| <b>3a</b> |           |           |           | 6         | -0.508567 | -1.794555 | -0.090662 |
| 6         | 0.000000  | 3.067020  | -0.003477 | 1         | -1.595171 | -1.676956 | -0.032503 |
| 1         | -1.075252 | 3.207859  | 0.073016  | 6         | 0.266548  | -0.677490 | -0.220402 |
| 1         | 0.614947  | 3.959242  | 0.033041  | 1         | 1.348063  | -0.794786 | -0.336891 |
| 6         | 0.544261  | 1.845420  | -0.175911 | 6         | -0.266548 | 0.677490  | -0.220402 |
| 1         | 1.623827  | 1.742980  | -0.289058 | 1         | -1.348063 | 0.794786  | -0.336891 |
| 6         | -0.257836 | 0.632050  | -0.231734 | 6         | 0.508567  | 1.794555  | -0.090662 |
| 1         | -1.345643 | 0.757045  | -0.264056 | 1         | 1.595171  | 1.676956  | -0.032503 |
| 6         | 0.257836  | -0.632050 | -0.231734 | 6         | 0.000000  | 3.149142  | -0.090731 |
| 1         | 1.345643  | -0.757045 | -0.264056 | 1         | -1.074831 | 3.286956  | -0.197771 |
| 6         | -0.544261 | -1.845420 | -0.175911 | 6         | 0.810321  | 4.219551  | 0.011684  |
| 1         | -1.623827 | -1.742980 | -0.289058 | 1         | 1.887876  | 4.112724  | 0.101982  |
| 6         | 0.000000  | -3.067020 | -0.003477 | 1         | 0.418119  | 5.230073  | -0.005934 |
| 1         | 1.075252  | -3.207859 | 0.073016  | 6         | 0.000000  | -3.149142 | -0.090731 |
| <hr/>     |           |           |           | 1         | 1.074831  | -3.286956 | -0.197771 |

Electronic Supplementary Material for PCCP  
 This journal is © The Owner Societies 2008

|   |           |           |           |
|---|-----------|-----------|-----------|
| 6 | -0.810321 | -4.219551 | 0.011684  |
| 1 | -1.887876 | -4.112724 | 0.101982  |
| 1 | -0.418119 | -5.230073 | -0.005934 |
| 3 | 0.000000  | 0.000000  | 1.874522  |

**4b**

|   |           |           |           |
|---|-----------|-----------|-----------|
| 6 | -1.706960 | -0.302379 | -0.231975 |
| 1 | -1.769552 | -1.384751 | -0.380677 |
| 6 | -2.951891 | 0.456994  | -0.251233 |
| 1 | -2.872185 | 1.542171  | -0.344687 |
| 3 | -2.568747 | -0.186336 | 1.828466  |
| 6 | -4.180010 | -0.102230 | -0.111776 |
| 1 | -4.314676 | -1.183392 | -0.078366 |
| 6 | -0.477885 | 0.284574  | -0.098119 |
| 1 | -0.432472 | 1.374577  | -0.015403 |
| 6 | 0.772739  | -0.413403 | -0.105390 |
| 1 | 0.760220  | -1.496436 | -0.227441 |
| 6 | 1.961064  | 0.239228  | 0.002620  |
| 1 | 1.957045  | 1.325923  | 0.109595  |
| 6 | 3.249459  | -0.407961 | -0.027514 |
| 1 | 3.271477  | -1.490366 | -0.139703 |
| 6 | 4.402128  | 0.281950  | 0.072086  |
| 1 | 4.409388  | 1.362903  | 0.180906  |
| 1 | -5.080530 | 0.502159  | -0.126266 |
| 1 | 5.365662  | -0.214419 | 0.044449  |

**5**

|   |           |           |           |
|---|-----------|-----------|-----------|
| 6 | -1.530796 | -0.412616 | -0.283893 |
| 1 | -2.611186 | -0.320459 | -0.262534 |
| 1 | -1.140274 | -1.374979 | -0.618613 |
| 6 | -0.739358 | 0.649220  | -0.008888 |
| 1 | -1.214651 | 1.593172  | 0.249247  |
| 6 | 0.741042  | 0.646379  | 0.000280  |
| 1 | 1.216815  | 1.583666  | 0.281149  |
| 6 | 1.531646  | -0.412509 | -0.288367 |
| 1 | 2.612026  | -0.324766 | -0.251362 |
| 1 | 1.141324  | -1.364903 | -0.649613 |
| 3 | -0.006418 | -0.871525 | 1.578980  |

**6**

|   |           |           |           |
|---|-----------|-----------|-----------|
| 6 | -2.595810 | -0.315442 | -0.325620 |
| 1 | -3.652722 | -0.127913 | -0.477950 |
| 1 | -2.271844 | -1.350607 | -0.462788 |
| 6 | -1.731186 | 0.699605  | -0.089162 |
| 1 | -2.134770 | 1.707254  | -0.006765 |
| 6 | -0.281409 | 0.567999  | 0.138758  |
| 1 | 0.213002  | 1.411619  | 0.620744  |
| 6 | 0.477554  | -0.498843 | -0.238591 |
| 1 | 0.000631  | -1.329035 | -0.767560 |
| 3 | -1.327336 | -0.766299 | 1.629198  |
| 6 | 1.922215  | -0.604406 | -0.052002 |
| 6 | 2.753620  | 0.452451  | -0.047431 |
| 1 | 3.822311  | 0.320681  | 0.078123  |

|   |          |           |           |
|---|----------|-----------|-----------|
| 1 | 2.401669 | 1.467167  | -0.208248 |
| 1 | 2.333819 | -1.608442 | 0.021136  |

**7a**

|   |           |           |           |
|---|-----------|-----------|-----------|
| 6 | 0.546896  | 0.023443  | 1.549603  |
| 1 | 1.541637  | -0.106926 | 1.108543  |
| 6 | -0.542453 | 0.135092  | 0.733758  |
| 1 | -1.516311 | 0.261616  | 1.205763  |
| 6 | -0.542453 | 0.135092  | -0.733758 |
| 1 | -1.516311 | 0.261616  | -1.205763 |
| 6 | 0.546896  | 0.023443  | -1.549603 |
| 1 | 1.541637  | -0.106926 | -1.108543 |
| 3 | 0.530765  | 1.970536  | 0.000000  |
| 6 | 0.494824  | -0.002725 | 3.008727  |
| 6 | 0.494824  | -0.002725 | -3.008727 |
| 6 | -0.542453 | -0.493479 | 3.710125  |
| 1 | -0.530689 | -0.497975 | 4.794109  |
| 6 | -0.542453 | -0.493479 | -3.710125 |
| 1 | -0.530689 | -0.497975 | -4.794109 |
| 1 | 1.378663  | 0.346806  | 3.537709  |
| 1 | -1.410333 | -0.933315 | 3.227915  |
| 1 | -1.410333 | -0.933315 | -3.227915 |
| 1 | 1.378663  | 0.346806  | -3.537709 |

**7b**

|   |           |           |           |
|---|-----------|-----------|-----------|
| 6 | 3.655843  | 0.423925  | 0.137772  |
| 1 | 4.732480  | 0.376818  | 0.020185  |
| 1 | 3.282699  | 1.245100  | 0.756933  |
| 6 | 2.837482  | -0.414635 | -0.545399 |
| 1 | 3.298767  | -1.175162 | -1.172728 |
| 6 | 1.370185  | -0.437235 | -0.483580 |
| 1 | 0.880397  | -1.317598 | -0.896093 |
| 6 | 0.598898  | 0.587243  | -0.004563 |
| 1 | 1.096419  | 1.530785  | 0.238992  |
| 3 | 2.156204  | -0.567883 | 1.633914  |
| 6 | -0.843259 | 0.588748  | 0.129117  |
| 6 | -1.616317 | -0.526366 | 0.195454  |
| 6 | -3.070464 | -0.521167 | 0.251240  |
| 1 | -3.546007 | -1.355680 | 0.761444  |
| 6 | -3.837656 | 0.420272  | -0.327946 |
| 1 | -4.918951 | 0.384202  | -0.257971 |
| 1 | -3.410402 | 1.232037  | -0.909145 |
| 1 | -1.320141 | 1.562764  | 0.209423  |
| 1 | -1.132144 | -1.504326 | 0.234650  |

**8a**

|   |           |           |           |
|---|-----------|-----------|-----------|
| 6 | 0.703197  | -0.709776 | -0.259843 |
| 1 | 0.492921  | -1.676347 | -0.725720 |
| 6 | -0.335440 | 0.147662  | -0.058140 |
| 1 | -0.145819 | 1.117650  | 0.410632  |
| 6 | -1.712629 | -0.158916 | -0.446103 |
| 1 | -1.870264 | -1.010393 | -1.110871 |

Electronic Supplementary Material for PCCP  
 This journal is © The Owner Societies 2008

|   |           |           |           |
|---|-----------|-----------|-----------|
| 6 | -2.783803 | 0.534389  | 0.007964  |
| 1 | -3.793318 | 0.274736  | -0.292499 |
| 1 | -2.668371 | 1.427923  | 0.620856  |
| 3 | -1.364479 | -0.886990 | 1.640685  |
| 6 | 2.097053  | -0.426122 | 0.064214  |
| 6 | 2.633136  | 0.806323  | 0.013733  |
| 1 | 3.678633  | 0.971235  | 0.248511  |
| 1 | 2.730772  | -1.278120 | 0.298644  |
| 1 | 2.059807  | 1.672922  | -0.302561 |

**8b**

|   |           |           |           |
|---|-----------|-----------|-----------|
| 6 | -2.441424 | -0.804012 | -0.162639 |
| 1 | -3.493682 | -1.002753 | -0.331912 |
| 1 | -1.813186 | -1.682629 | 0.009236  |
| 6 | -1.936353 | 0.448354  | -0.273784 |
| 1 | -2.626637 | 1.262895  | -0.485605 |
| 6 | -0.529392 | 0.829013  | -0.073506 |
| 1 | -0.329023 | 1.886468  | 0.101131  |
| 6 | 0.529882  | -0.027665 | -0.152214 |
| 1 | 0.360162  | -1.067921 | -0.445568 |
| 3 | -1.211443 | -0.262070 | 1.781028  |
| 6 | 1.908996  | 0.361852  | 0.049698  |
| 1 | 2.113257  | 1.401906  | 0.297359  |
| 6 | 2.922099  | -0.514994 | -0.085721 |
| 1 | 3.954232  | -0.212499 | 0.050588  |
| 1 | 2.746358  | -1.554543 | -0.349317 |

**9a**

|   |           |           |           |
|---|-----------|-----------|-----------|
| 6 | -1.710444 | 0.246590  | 0.030176  |
| 1 | -1.609014 | 1.211947  | 0.535876  |
| 6 | -0.578939 | -0.420810 | -0.343101 |
| 1 | -0.675203 | -1.355837 | -0.902221 |
| 6 | 0.765576  | 0.052114  | -0.042326 |
| 1 | 0.869861  | 1.077995  | 0.322851  |
| 6 | 1.884878  | -0.717338 | -0.175257 |
| 1 | 1.768289  | -1.744018 | -0.534915 |
| 3 | -0.006636 | -1.035962 | 1.719313  |
| 6 | 3.247641  | -0.259889 | 0.076506  |
| 6 | 3.653778  | 1.009238  | -0.106987 |
| 1 | 4.679496  | 1.301700  | 0.087153  |
| 6 | -3.056899 | -0.199011 | -0.256133 |
| 1 | -3.176639 | -1.134091 | -0.800916 |
| 6 | -4.139747 | 0.514078  | 0.106971  |
| 1 | -5.143479 | 0.177920  | -0.127156 |
| 1 | -4.049329 | 1.458782  | 0.636167  |
| 1 | 3.970964  | -1.014141 | 0.378083  |
| 1 | 2.989901  | 1.777801  | -0.491956 |

**9b**

|   |           |           |           |
|---|-----------|-----------|-----------|
| 6 | -0.897097 | 0.046552  | 0.079535  |
| 1 | -1.023166 | 1.086927  | 0.377182  |
| 6 | 0.429749  | -0.432247 | -0.177799 |

|   |           |           |           |
|---|-----------|-----------|-----------|
| 1 | 0.524771  | -1.476417 | -0.490065 |
| 6 | 1.565356  | 0.326599  | -0.103966 |
| 1 | 1.483768  | 1.389489  | 0.143189  |
| 6 | 2.893476  | -0.199944 | -0.399695 |
| 1 | 2.945947  | -1.182264 | -0.874048 |
| 3 | 2.535526  | -0.404567 | 1.774683  |
| 6 | -1.983922 | -0.757987 | -0.051880 |
| 1 | -1.819678 | -1.806993 | -0.304018 |
| 6 | -3.364279 | -0.335930 | 0.130264  |
| 1 | -4.073339 | -1.103369 | 0.431891  |
| 6 | -3.806935 | 0.913339  | -0.101152 |
| 1 | -3.153943 | 1.696250  | -0.475496 |
| 6 | 4.046585  | 0.437005  | -0.076990 |
| 1 | 4.045554  | 1.444061  | 0.339917  |
| 1 | 5.014038  | 0.005762  | -0.310525 |
| 1 | -4.848132 | 1.175940  | 0.048019  |

**9c**

|   |           |           |           |
|---|-----------|-----------|-----------|
| 6 | 3.498752  | 0.996053  | -0.108436 |
| 1 | 4.526520  | 1.305971  | -0.259340 |
| 1 | 2.786575  | 1.798076  | 0.104551  |
| 6 | 3.118776  | -0.292879 | -0.296831 |
| 1 | 3.889934  | -1.019782 | -0.546344 |
| 6 | 1.762520  | -0.826076 | -0.127943 |
| 1 | 1.668189  | -1.908399 | -0.038686 |
| 6 | 0.618617  | -0.071537 | -0.147409 |
| 1 | 0.692497  | 0.998733  | -0.365406 |
| 3 | 2.338698  | 0.203819  | 1.776162  |
| 6 | -0.706336 | -0.591863 | 0.020841  |
| 1 | -0.822481 | -1.660774 | 0.199178  |
| 6 | -1.808243 | 0.201486  | -0.068745 |
| 1 | -1.675942 | 1.267714  | -0.265289 |
| 6 | -3.162991 | -0.272961 | 0.065030  |
| 1 | -3.313390 | -1.334390 | 0.252910  |
| 6 | -4.225057 | 0.549189  | -0.041830 |
| 1 | -5.240252 | 0.181200  | 0.055390  |
| 1 | -4.103973 | 1.611724  | -0.233515 |

**10a**

|   |           |           |           |
|---|-----------|-----------|-----------|
| 6 | 0.501285  | 1.794428  | 0.138034  |
| 1 | 1.583784  | 1.668455  | 0.234440  |
| 6 | -0.270641 | 0.676394  | 0.011265  |
| 1 | -1.354411 | 0.789051  | -0.082206 |
| 6 | 0.270641  | -0.676394 | 0.011265  |
| 1 | 1.354411  | -0.789051 | -0.082206 |
| 6 | -0.501285 | -1.794428 | 0.138034  |
| 1 | -1.583784 | -1.668455 | 0.234440  |
| 3 | 0.000000  | 0.000000  | 2.106935  |
| 6 | 0.000000  | -3.164416 | 0.102010  |
| 6 | 0.000000  | 3.164416  | 0.102010  |
| 6 | 1.079645  | -3.544397 | -0.604483 |
| 1 | 1.411656  | -4.576434 | -0.606654 |

Electronic Supplementary Material for PCCP  
 This journal is © The Owner Societies 2008

|   |           |           |           |
|---|-----------|-----------|-----------|
| 6 | -1.079645 | 3.544397  | -0.604483 |
| 1 | -1.411656 | 4.576434  | -0.606654 |
| 1 | 1.635515  | -2.849935 | -1.227684 |
| 1 | -0.577001 | -3.912630 | 0.640742  |
| 1 | 0.577001  | 3.912630  | 0.640742  |
| 1 | -1.635515 | 2.849935  | -1.227684 |

**10b**

|   |           |           |           |
|---|-----------|-----------|-----------|
| 6 | -1.567110 | 0.832189  | 0.006214  |
| 1 | -1.302390 | 1.857978  | 0.263175  |
| 6 | -0.559720 | -0.085130 | -0.134623 |
| 1 | -0.798836 | -1.082594 | -0.516736 |
| 6 | 0.828314  | 0.182522  | 0.111445  |
| 1 | 1.106379  | 1.170189  | 0.477291  |
| 6 | 1.787032  | -0.754635 | -0.113139 |
| 1 | 1.469907  | -1.748074 | -0.435674 |
| 6 | 3.216760  | -0.546456 | 0.053497  |
| 6 | -2.988268 | 0.558772  | -0.238372 |
| 6 | 3.826890  | 0.644300  | -0.090691 |
| 1 | 4.898190  | 0.744599  | 0.041763  |
| 6 | -3.574093 | -0.664720 | -0.250636 |
| 1 | -4.634853 | -0.777430 | -0.443617 |
| 1 | 3.816832  | -1.428255 | 0.265410  |
| 1 | 3.283627  | 1.540582  | -0.375303 |
| 1 | -3.004594 | -1.594465 | -0.166416 |
| 1 | -3.626467 | 1.430850  | -0.370436 |
| 3 | -2.342210 | -0.371479 | 1.732790  |

**11**

|   |           |           |           |
|---|-----------|-----------|-----------|
| 6 | 0.525795  | 1.108508  | 0.682827  |
| 6 | -0.086443 | 0.193724  | 1.653752  |
| 6 | -0.086443 | -1.161398 | 1.663333  |
| 6 | -0.086443 | -1.161398 | -1.663333 |
| 6 | -0.086443 | 0.193724  | -1.653752 |
| 6 | 0.525795  | 1.108508  | -0.682827 |
| 1 | 0.949662  | 2.000631  | 1.141259  |
| 1 | -0.560444 | 0.693895  | 2.501003  |
| 1 | -0.574879 | -1.697949 | 2.471584  |
| 1 | -0.574879 | -1.697949 | -2.471584 |
| 1 | -0.560444 | 0.693895  | -2.501003 |
| 1 | 0.949662  | 2.000631  | -1.141259 |
| 1 | 0.497615  | -1.753337 | -0.971426 |
| 1 | 0.497615  | -1.753337 | 0.971426  |
| 3 | -1.619605 | -0.058830 | 0.000000  |

**12a**

|   |           |           |           |
|---|-----------|-----------|-----------|
| 6 | 1.132583  | -1.453952 | -0.267458 |
| 6 | -0.253011 | -1.266471 | 0.159399  |
| 6 | -1.113640 | -0.273143 | -0.212737 |
| 6 | 1.426132  | 1.849636  | -0.007614 |
| 6 | 2.316912  | 0.827215  | 0.047498  |
| 6 | 2.182973  | -0.578055 | -0.349984 |

|   |           |           |           |
|---|-----------|-----------|-----------|
| 1 | 1.391710  | -2.494275 | -0.462548 |
| 1 | -0.667624 | -2.084870 | 0.754526  |
| 1 | 1.710252  | 2.827487  | 0.369659  |
| 1 | 3.302547  | 1.067697  | 0.449497  |
| 1 | 3.132159  | -1.034565 | -0.623697 |
| 1 | 0.473626  | 1.787807  | -0.514126 |
| 1 | -0.803532 | 0.444832  | -0.969087 |
| 3 | 0.828895  | 0.065185  | 1.587797  |
| 6 | -2.492708 | -0.197515 | 0.224260  |
| 6 | -3.332676 | 0.750192  | -0.232342 |
| 1 | -4.368566 | 0.789405  | 0.085147  |
| 1 | -2.846893 | -0.950162 | 0.926828  |
| 1 | -3.009755 | 1.503651  | -0.945717 |

**12b**

|   |           |           |           |
|---|-----------|-----------|-----------|
| 6 | 1.261364  | -1.442369 | -0.131570 |
| 6 | -0.115295 | -1.129035 | -0.489638 |
| 6 | -0.889788 | -0.109567 | -0.019777 |
| 6 | 1.846457  | 1.691823  | -0.507571 |
| 6 | 2.201429  | 0.847833  | 0.474389  |
| 6 | 2.228156  | -0.612545 | 0.331576  |
| 1 | 1.535079  | -2.486945 | -0.265798 |
| 1 | -0.577546 | -1.817355 | -1.203706 |
| 1 | 1.918149  | 2.766374  | -0.378549 |
| 1 | 2.608139  | 1.250001  | 1.401683  |
| 1 | 3.172496  | -1.085115 | 0.603461  |
| 1 | 1.510898  | 1.330928  | -1.475248 |
| 1 | -0.461900 | 0.621665  | 0.668267  |
| 6 | -2.281354 | 0.070442  | -0.424005 |
| 3 | -2.218860 | -1.230994 | 1.378033  |
| 6 | -3.151602 | 0.872550  | 0.237074  |
| 1 | -4.182701 | 0.974049  | -0.084240 |
| 1 | -2.827896 | 1.509826  | 1.059576  |
| 1 | -2.634344 | -0.505240 | -1.282414 |

**13**

|   |           |           |           |
|---|-----------|-----------|-----------|
| 6 | -1.102759 | -1.558378 | -0.000789 |
| 6 | 0.317297  | -1.218782 | -0.109736 |
| 6 | 0.980012  | -0.412907 | 0.759292  |
| 6 | -1.517055 | 1.738083  | 0.397413  |
| 6 | -2.049658 | 0.771449  | -0.385825 |
| 6 | -2.119641 | -0.673992 | -0.112872 |
| 1 | -1.353917 | -2.616004 | 0.059187  |
| 1 | 0.873012  | -1.675559 | -0.933210 |
| 1 | -1.628735 | 2.786790  | 0.128913  |
| 1 | -2.577320 | 1.090994  | -1.287732 |
| 1 | -3.131082 | -1.078723 | -0.129349 |
| 1 | -1.108258 | 1.518356  | 1.379864  |
| 1 | 0.486602  | -0.126308 | 1.686763  |
| 6 | 2.327404  | 0.123327  | 0.516925  |
| 6 | 2.811120  | 0.394242  | -0.716023 |
| 1 | 3.807934  | 0.794231  | -0.864481 |

Electronic Supplementary Material for PCCP  
 This journal is © The Owner Societies 2008

|   |          |          |           |
|---|----------|----------|-----------|
| 1 | 2.931891 | 0.371068 | 1.387170  |
| 1 | 2.253456 | 0.151254 | -1.625904 |
| 3 | 0.522034 | 1.268548 | -0.630512 |

**14**

|   |           |           |           |
|---|-----------|-----------|-----------|
| 6 | -2.852156 | 0.957042  | -0.513002 |
| 6 | 2.069219  | 1.257840  | 0.731745  |
| 6 | 2.171853  | 0.631656  | -0.465745 |
| 6 | -2.042492 | -0.112594 | -0.358316 |
| 6 | 1.634375  | -0.687021 | -0.839986 |
| 6 | -1.354559 | -0.417043 | 0.907903  |
| 6 | -0.125255 | -0.986550 | 0.960151  |

|   |           |           |           |
|---|-----------|-----------|-----------|
| 1 | -3.350988 | 1.155080  | -1.456165 |
| 1 | 2.526536  | 2.231722  | 0.876854  |
| 1 | 2.726055  | 1.141425  | -1.253450 |
| 1 | -1.879145 | -0.784441 | -1.202399 |
| 1 | -1.848853 | -0.126552 | 1.834257  |
| 1 | 2.073467  | -1.121539 | -1.735476 |
| 1 | 0.328622  | -1.176479 | 1.933146  |
| 6 | 0.632538  | -1.388561 | -0.248592 |
| 1 | 0.358626  | -2.342837 | -0.700463 |
| 1 | -3.073680 | 1.629960  | 0.312909  |
| 1 | 1.621904  | 0.796206  | 1.606714  |
| 3 | -0.094560 | 1.022946  | -0.420288 |

**Table S4:** The MP2(FULL)/6-31G\* optimized cartesian coordinates of the cyclic Li<sup>+</sup> complexes.

**15**

|   |           |           |           |
|---|-----------|-----------|-----------|
| 6 | -0.790363 | 0.677070  | -0.182247 |
| 6 | -0.790363 | -0.677070 | -0.182247 |
| 6 | 0.790363  | -0.677070 | -0.182247 |
| 6 | 0.790363  | 0.677070  | -0.182247 |
| 1 | -1.546657 | 1.439482  | -0.337197 |
| 1 | 1.546657  | 1.439482  | -0.337197 |
| 1 | -1.546657 | -1.439482 | -0.337197 |
| 1 | 1.546657  | -1.439482 | -0.337197 |
| 3 | 0.000000  | 0.000000  | 1.907570  |

**16**

|   |           |           |           |
|---|-----------|-----------|-----------|
| 6 | 0.000000  | 1.404878  | -0.125055 |
| 6 | 1.216660  | 0.702439  | -0.125055 |
| 6 | 1.216660  | -0.702439 | -0.125055 |
| 6 | 0.000000  | -1.404878 | -0.125055 |
| 6 | -1.216660 | -0.702439 | -0.125055 |
| 6 | -1.216660 | 0.702439  | -0.125055 |
| 1 | 0.000000  | 2.491599  | -0.142048 |
| 1 | 2.157788  | 1.245800  | -0.142048 |
| 1 | 2.157788  | -1.245800 | -0.142048 |
| 1 | 0.000000  | -2.491599 | -0.142048 |
| 1 | -2.157788 | -1.245800 | -0.142048 |
| 1 | -2.157788 | 1.245800  | -0.142048 |
| 3 | 0.000000  | 0.000000  | 1.784756  |

**17**

|   |           |           |           |
|---|-----------|-----------|-----------|
| 6 | -0.659730 | 0.256518  | 1.577451  |
| 6 | 0.696629  | 0.336328  | 1.549614  |
| 6 | 1.585181  | -0.442669 | 0.671870  |
| 6 | -1.508119 | -0.541723 | 0.677436  |
| 6 | 1.585181  | -0.442669 | -0.671870 |
| 6 | -1.508119 | -0.541723 | -0.677436 |
| 6 | -0.659730 | 0.256518  | -1.577451 |
| 1 | -1.175367 | 0.749360  | 2.405520  |
| 1 | 1.181495  | 0.903245  | 2.346741  |
| 1 | 2.344005  | -1.026451 | 1.191173  |

|   |           |           |           |
|---|-----------|-----------|-----------|
| 1 | -2.281705 | -1.124380 | 1.175873  |
| 1 | -2.281705 | -1.124380 | -1.175873 |
| 1 | 2.344005  | -1.026451 | -1.191173 |
| 1 | -1.175367 | 0.749360  | -2.405520 |
| 6 | 0.696629  | 0.336328  | -1.549614 |
| 1 | 1.181495  | 0.903245  | -2.346741 |
| 3 | -0.501464 | 1.898331  | 0.000000  |

**18**

|   |           |           |           |
|---|-----------|-----------|-----------|
| 6 | 0.012276  | 2.486314  | 0.707613  |
| 6 | 0.031841  | 1.302646  | 1.412409  |
| 6 | 0.068704  | 0.063100  | 0.721142  |
| 6 | 0.068704  | 0.063100  | -0.721142 |
| 6 | 0.031841  | 1.302646  | -1.412409 |
| 6 | 0.012276  | 2.486314  | -0.707613 |
| 1 | 0.127648  | -1.189379 | 2.496830  |
| 1 | 0.000573  | 3.431838  | 1.242526  |
| 1 | 0.041678  | 1.304587  | 2.500184  |
| 6 | 0.111285  | -1.186999 | 1.408267  |
| 6 | 0.111285  | -1.186999 | -1.408267 |
| 1 | 0.041678  | 1.304587  | -2.500184 |
| 1 | 0.000573  | 3.431838  | -1.242526 |
| 6 | 0.155227  | -2.386648 | -0.710959 |
| 6 | 0.155227  | -2.386648 | 0.710959  |
| 1 | 0.127648  | -1.189379 | -2.496830 |
| 1 | 0.206686  | -3.328344 | -1.251259 |
| 1 | 0.206686  | -3.328344 | 1.251259  |
| 3 | -1.768386 | -1.259453 | 0.000000  |

**19a**

|   |           |          |           |
|---|-----------|----------|-----------|
| 6 | -0.008393 | 3.729295 | 0.710405  |
| 6 | 0.003684  | 2.548997 | 1.412322  |
| 6 | 0.019217  | 1.304157 | 0.723046  |
| 6 | 0.019217  | 1.304157 | -0.723046 |
| 6 | 0.003684  | 2.548997 | -1.412322 |
| 6 | -0.008393 | 3.729295 | -0.710405 |
| 6 | 0.034999  | 0.085981 | 1.412240  |
| 6 | 0.034999  | 0.085981 | -1.412240 |



Electronic Supplementary Material for PCCP  
This journal is © The Owner Societies 2008

|   |           |           |           |
|---|-----------|-----------|-----------|
| 6 | 0.073038  | -1.136715 | -0.726802 |
| 6 | 0.073038  | -1.136715 | 0.726802  |
| 6 | 0.111574  | -2.394995 | 1.411604  |
| 1 | 0.128613  | -2.398808 | 2.500461  |
| 6 | 0.145550  | -3.590131 | 0.714524  |
| 6 | 0.145550  | -3.590131 | -0.714524 |
| 6 | 0.111574  | -2.394995 | -1.411604 |
| 1 | 0.043846  | 0.086854  | 2.502301  |
| 1 | -0.016180 | 4.675863  | 1.243930  |
| 1 | 0.007483  | 2.551201  | 2.500201  |
| 1 | 0.007483  | 2.551201  | -2.500201 |
| 1 | -0.016180 | 4.675863  | -1.243930 |
| 1 | 0.043846  | 0.086854  | -2.502301 |
| 1 | 0.190815  | -4.533218 | 1.252979  |
| 1 | 0.190815  | -4.533218 | -1.252979 |
| 1 | 0.128613  | -2.398808 | -2.500461 |
| 3 | -1.755062 | -2.440951 | 0.000000  |

**19b**

|   |           |           |           |
|---|-----------|-----------|-----------|
| 6 | -3.661687 | 0.711087  | -0.074941 |
| 6 | -2.483461 | 1.415267  | -0.054410 |
| 6 | -1.234209 | 0.725612  | -0.048601 |
| 6 | -1.234209 | -0.725612 | -0.048601 |
| 6 | -2.483461 | -1.415267 | -0.054410 |
| 6 | -3.661687 | -0.711087 | -0.074941 |
| 6 | 0.000000  | 1.408134  | -0.036463 |
| 6 | 0.000000  | -1.408134 | -0.036463 |
| 6 | 1.234209  | -0.725612 | -0.048601 |
| 6 | 1.234209  | 0.725612  | -0.048601 |
| 6 | 2.483461  | 1.415267  | -0.054410 |
| 1 | 2.485676  | 2.503130  | -0.066040 |
| 6 | 3.661687  | 0.711087  | -0.074941 |
| 6 | 3.661687  | -0.711087 | -0.074941 |
| 6 | 2.483461  | -1.415267 | -0.054410 |
| 1 | 0.000000  | 2.498571  | -0.048816 |
| 1 | -4.607822 | 1.244785  | -0.096082 |
| 1 | -2.485676 | 2.503130  | -0.066040 |
| 1 | -2.485676 | -2.503130 | -0.066040 |
| 1 | -4.607822 | -1.244785 | -0.096082 |
| 1 | 0.000000  | -2.498571 | -0.048816 |
| 1 | 4.607822  | 1.244785  | -0.096082 |
| 1 | 4.607822  | -1.244785 | -0.096082 |
| 1 | 2.485676  | -2.503130 | -0.066040 |
| 3 | 0.000000  | 0.000000  | 1.818180  |

**20a**

|   |          |           |           |
|---|----------|-----------|-----------|
| 6 | 3.618484 | -0.307174 | 0.026043  |
| 6 | 2.905068 | 0.875325  | 0.016843  |
| 6 | 1.493839 | 0.863187  | 0.009017  |
| 6 | 0.800882 | -0.381200 | -0.059382 |
| 6 | 1.554324 | -1.575182 | -0.033109 |
| 6 | 2.937117 | -1.536311 | -0.016834 |
| 6 | 0.765430 | 2.093127  | -0.026488 |

|   |           |           |           |
|---|-----------|-----------|-----------|
| 6 | -0.648578 | -0.364197 | -0.053825 |
| 6 | -1.339193 | 0.897039  | -0.092446 |
| 6 | -0.598130 | 2.118975  | -0.040310 |
| 6 | -2.761490 | 0.914901  | -0.114518 |
| 1 | -3.270742 | 1.876775  | -0.140154 |
| 6 | -3.501468 | -0.262458 | -0.145430 |
| 6 | -2.827725 | -1.505932 | -0.133341 |
| 6 | -1.435384 | -1.549674 | -0.101886 |
| 1 | 1.324149  | 3.026782  | -0.003551 |
| 1 | 4.704652  | -0.289267 | 0.038400  |
| 1 | 3.423291  | 1.831226  | 0.045736  |
| 1 | 1.067521  | -2.544162 | -0.085688 |
| 1 | 3.499456  | -2.466011 | -0.015398 |
| 1 | -1.137129 | 3.063034  | -0.076697 |
| 1 | -4.587049 | -0.227625 | -0.185675 |
| 1 | -3.394737 | -2.432380 | -0.175196 |
| 1 | -0.952200 | -2.521742 | -0.101658 |
| 3 | -2.152088 | -0.333062 | 1.764624  |

**20b**

|   |           |           |           |
|---|-----------|-----------|-----------|
| 6 | -0.322730 | -0.050805 | 3.561686  |
| 6 | 0.856855  | -0.073099 | 2.845985  |
| 6 | 0.838192  | -0.080278 | 1.430474  |
| 6 | -0.414293 | -0.047523 | 0.730468  |
| 6 | -1.602919 | -0.009276 | 1.499412  |
| 6 | -1.554637 | -0.018437 | 2.881387  |
| 6 | 2.068991  | -0.112671 | 0.686509  |
| 6 | -0.414293 | -0.047523 | -0.730468 |
| 6 | 0.838192  | -0.080278 | -1.430474 |
| 6 | 2.068991  | -0.112671 | -0.686509 |
| 6 | 0.856855  | -0.073099 | -2.845985 |
| 1 | 1.815346  | -0.108174 | -3.359816 |
| 6 | -0.322730 | -0.050805 | -3.561686 |
| 6 | -1.554637 | -0.018437 | -2.881387 |
| 6 | -1.602919 | -0.009276 | -1.499412 |
| 1 | 3.009542  | -0.152752 | 1.233445  |
| 1 | -0.301665 | -0.061079 | 4.647739  |
| 1 | 1.815346  | -0.108174 | 3.359816  |
| 1 | -2.572330 | 0.005398  | 1.012452  |
| 1 | -2.482097 | -0.003897 | 3.447318  |
| 1 | 3.009542  | -0.152752 | -1.233445 |
| 1 | -0.301665 | -0.061079 | -4.647739 |
| 1 | -2.482097 | -0.003897 | -3.447318 |
| 1 | -2.572330 | 0.005398  | -1.012452 |
| 3 | 0.876306  | 1.782029  | 0.000000  |

**21a**

|   |          |           |           |
|---|----------|-----------|-----------|
| 6 | 4.803499 | 0.715793  | -0.133531 |
| 6 | 3.609133 | 1.412448  | -0.108966 |
| 6 | 2.348290 | 0.729083  | -0.076091 |
| 6 | 2.348293 | -0.729080 | -0.075969 |
| 6 | 3.609134 | -1.412446 | -0.108962 |
| 6 | 4.803499 | -0.715791 | -0.133532 |

Electronic Supplementary Material for PCCP  
 This journal is © The Owner Societies 2008

|            |           |           |           |   |           |           |           |
|------------|-----------|-----------|-----------|---|-----------|-----------|-----------|
| 6          | 1.129802  | 1.414937  | -0.039343 | 1 | 0.082034  | -3.685646 | 2.504119  |
| 6          | 1.129803  | -1.414935 | -0.039320 | 1 | 0.082034  | -3.685646 | -2.504119 |
| 6          | -0.096112 | -0.728408 | -0.025933 | 1 | 0.131910  | -5.805471 | -1.245986 |
| 6          | -0.096116 | 0.728411  | -0.026276 | 1 | 0.131910  | -5.805471 | 1.245986  |
| 6          | -1.323542 | 1.411998  | -0.012146 | 3 | -1.817105 | -1.214027 | 0.000000  |
| 1          | -1.326218 | 2.502050  | -0.015875 |   |           |           |           |
| 6          | -2.538095 | 0.723835  | -0.003134 |   |           |           |           |
| 6          | -2.538092 | -0.723835 | -0.002842 |   |           |           |           |
| 6          | -1.323540 | -1.411998 | -0.012084 |   |           |           |           |
| 1          | 1.130948  | 2.505422  | -0.048400 |   |           |           |           |
| 1          | 5.747030  | 1.253977  | -0.171806 |   |           |           |           |
| 1          | 3.613704  | 2.501452  | -0.125808 |   |           |           |           |
| 1          | 3.613704  | -2.501451 | -0.125775 |   |           |           |           |
| 1          | 5.747030  | -1.253975 | -0.171831 |   |           |           |           |
| 1          | 1.130950  | -2.505422 | -0.048177 |   |           |           |           |
| 1          | -1.326212 | -2.502051 | -0.015488 |   |           |           |           |
| 6          | -3.786247 | 1.411949  | 0.005200  |   |           |           |           |
| 6          | -3.786244 | -1.411950 | 0.005372  |   |           |           |           |
| 6          | -4.965667 | 0.711697  | 0.012899  |   |           |           |           |
| 6          | -4.965665 | -0.711699 | 0.013034  |   |           |           |           |
| 1          | -3.788001 | 2.500021  | 0.003413  |   |           |           |           |
| 1          | -3.787996 | -2.500023 | 0.003811  |   |           |           |           |
| 1          | -5.912393 | -1.245249 | 0.018075  |   |           |           |           |
| 1          | -5.912396 | 1.245245  | 0.017932  |   |           |           |           |
| 3          | 3.632352  | -0.000009 | 1.749889  |   |           |           |           |
| <b>21b</b> |           |           |           |   |           |           |           |
| 6          | 0.049042  | 4.913420  | 0.711657  |   |           |           |           |
| 6          | 0.035424  | 3.734507  | 1.412973  |   |           |           |           |
| 6          | 0.023166  | 2.486460  | 0.724490  |   |           |           |           |
| 6          | 0.023166  | 2.486460  | -0.724490 |   |           |           |           |
| 6          | 0.035424  | 3.734507  | -1.412973 |   |           |           |           |
| 6          | 0.049042  | 4.913420  | -0.711657 |   |           |           |           |
| 6          | 0.012080  | 1.272874  | 1.414276  |   |           |           |           |
| 6          | 0.012080  | 1.272874  | -1.414276 |   |           |           |           |
| 6          | 0.025130  | 0.041716  | -0.730861 |   |           |           |           |
| 6          | 0.025130  | 0.041716  | 0.730861  |   |           |           |           |
| 6          | 0.024696  | -1.202034 | 1.410828  |   |           |           |           |
| 1          | 0.036831  | -1.204303 | 2.501493  |   |           |           |           |
| 6          | 0.051227  | -2.430273 | 0.727656  |   |           |           |           |
| 6          | 0.051227  | -2.430273 | -0.727656 |   |           |           |           |
| 6          | 0.024696  | -1.202034 | -1.410828 |   |           |           |           |
| 1          | 0.022537  | 1.275116  | 2.504279  |   |           |           |           |
| 1          | 0.062049  | 5.859762  | 1.245530  |   |           |           |           |
| 1          | 0.039443  | 3.737422  | 2.500870  |   |           |           |           |
| 1          | 0.039443  | 3.737422  | -2.500870 |   |           |           |           |
| 1          | 0.062049  | 5.859762  | -1.245530 |   |           |           |           |
| 1          | 0.022537  | 1.275116  | -2.504279 |   |           |           |           |
| 1          | 0.036831  | -1.204303 | -2.501493 |   |           |           |           |
| 6          | 0.069737  | -3.683290 | 1.416172  |   |           |           |           |
| 6          | 0.069737  | -3.683290 | -1.416172 |   |           |           |           |
| 6          | 0.101306  | -4.859353 | 0.712665  |   |           |           |           |
| 6          | 0.101306  | -4.859353 | -0.712665 |   |           |           |           |

**Table S5:** The MP2(FULL)/6-31G\* optimized cartesian coordinates of the acyclic Mg<sup>2+</sup> complexes considered in the study.

| <b>1</b> |           |           |           |
|----------|-----------|-----------|-----------|
| 6        | 0.000000  | 0.687223  | -0.979309 |
| 1        | -0.933921 | 1.249955  | -1.066914 |
| 1        | 0.933921  | 1.249955  | -1.066914 |
| 6        | 0.000000  | -0.687223 | -0.979309 |
| 1        | 0.933921  | -1.249955 | -1.066914 |
| 1        | -0.933921 | -1.249955 | -1.066914 |
| 12       | 0.000000  | 0.000000  | 1.334947  |

  

| <b>2</b> |           |           |           |
|----------|-----------|-----------|-----------|
| 6        | 0.000000  | 1.840897  | -0.397870 |
| 1        | -0.670710 | 2.697960  | -0.393573 |
| 1        | 1.062920  | 2.049539  | -0.237544 |
| 6        | -0.448195 | 0.600766  | -0.749038 |
| 1        | -1.494428 | 0.457394  | -1.039434 |
| 6        | 0.448195  | -0.600766 | -0.749038 |
| 1        | 1.494428  | -0.457394 | -1.039434 |
| 6        | 0.000000  | -1.840897 | -0.397870 |
| 1        | 0.670710  | -2.697960 | -0.393573 |
| 1        | -1.062920 | -2.049539 | -0.237544 |
| 12       | 0.000000  | 0.000000  | 1.425333  |

  

| <b>3a</b> |           |           |           |
|-----------|-----------|-----------|-----------|
| 6         | 1.085592  | 2.871235  | -0.645385 |
| 1         | 0.128948  | 3.389414  | -0.641273 |
| 1         | 1.968898  | 3.474751  | -0.830639 |
| 6         | 1.182448  | 1.529506  | -0.469619 |
| 1         | 2.155768  | 1.040102  | -0.523119 |
| 6         | 0.000000  | 0.707858  | -0.345054 |
| 1         | -0.973866 | 1.209095  | -0.441759 |
| 6         | 0.000000  | -0.707858 | -0.345054 |
| 1         | 0.973866  | -1.209095 | -0.441759 |
| 6         | -1.182448 | -1.529506 | -0.469619 |
| 1         | -2.155768 | -1.040102 | -0.523119 |
| 6         | -1.085592 | -2.871235 | -0.645385 |

  

| <b>3b</b> |           |           |           |
|-----------|-----------|-----------|-----------|
| 6         | 2.636429  | -0.769801 | 0.228788  |
| 1         | 3.480601  | -1.240750 | -0.267341 |
| 1         | 2.824329  | -0.384804 | 1.241250  |
| 6         | 1.361459  | -0.894661 | -0.259511 |
| 1         | 1.203301  | -1.429485 | -1.200175 |
| 12        | 1.618361  | 1.342880  | -0.228220 |
| 6         | 0.186205  | -0.254720 | 0.382577  |
| 1         | 0.238969  | -0.117070 | 1.472382  |
| 6         | -1.074764 | -0.262995 | -0.208362 |
| 1         | -1.158003 | -0.610394 | -1.242678 |
| 6         | -2.281372 | 0.103029  | 0.442521  |
| 1         | -2.257787 | 0.429525  | 1.479712  |
| 6         | -3.465736 | -0.021239 | -0.214682 |
| 1         | -3.515699 | -0.360704 | -1.246698 |
| 1         | -4.409365 | 0.201443  | 0.274204  |

  

| <b>4a</b> |           |           |           |
|-----------|-----------|-----------|-----------|
| 6         | -1.886460 | -0.256604 | -0.230202 |
| 1         | -1.927900 | -0.197984 | -1.324988 |
| 6         | -0.642795 | -0.306662 | 0.381018  |
| 1         | -0.591714 | -0.521714 | 1.454873  |
| 6         | 0.642765  | -0.306727 | -0.380999 |
| 1         | 0.591672  | -0.521859 | -1.454837 |
| 6         | 1.886432  | -0.256587 | 0.230211  |
| 1         | 1.927869  | -0.197865 | 1.324993  |
| 12        | 0.000068  | 1.768708  | -0.000042 |
| 6         | 3.137687  | -0.393233 | -0.453100 |
| 1         | 3.135722  | -0.507028 | -1.535332 |
| 6         | -3.137714 | -0.393174 | 0.453120  |

Electronic Supplementary Material for PCCP  
 This journal is © The Owner Societies 2008

|   |           |           |           |
|---|-----------|-----------|-----------|
| 1 | -3.135756 | -0.506862 | 1.535363  |
| 6 | 4.299917  | -0.447670 | 0.239435  |
| 1 | 4.329790  | -0.359019 | 1.322674  |
| 1 | 5.248443  | -0.601610 | -0.264631 |
| 6 | -4.299942 | -0.447664 | -0.239416 |
| 1 | -5.248475 | -0.601526 | 0.264660  |
| 1 | -4.329807 | -0.359113 | -1.322664 |

|    |           |           |           |
|----|-----------|-----------|-----------|
| 1  | 0.447464  | -0.215077 | -1.522402 |
| 6  | 0.803698  | -0.252394 | 0.591515  |
| 1  | 0.359874  | -0.523461 | 1.554736  |
| 12 | -1.439250 | 1.363055  | -0.162496 |
| 6  | 2.201228  | 0.075445  | 0.630632  |
| 6  | 3.028564  | -0.032867 | -0.438753 |
| 1  | 4.091634  | 0.160623  | -0.333753 |
| 1  | 2.694795  | -0.363771 | -1.418762 |
| 1  | 2.620734  | 0.307286  | 1.605926  |

**4b**

|    |           |           |           |
|----|-----------|-----------|-----------|
| 6  | -1.292348 | -0.098709 | 0.355863  |
| 1  | -1.339311 | 0.176540  | 1.419340  |
| 6  | -2.424006 | -0.925954 | -0.127100 |
| 1  | -2.235805 | -1.608384 | -0.960054 |
| 12 | -2.825401 | 1.262385  | -0.416325 |
| 6  | -3.710012 | -0.788281 | 0.330850  |
| 1  | -3.922592 | -0.244686 | 1.263805  |
| 6  | 0.005973  | -0.260045 | -0.190725 |
| 1  | 0.088068  | -0.782699 | -1.147986 |
| 6  | 1.186732  | 0.163301  | 0.406849  |
| 1  | 1.161856  | 0.669130  | 1.370704  |
| 6  | 2.410955  | -0.110597 | -0.192732 |
| 1  | 2.412514  | -0.625537 | -1.156117 |
| 6  | 3.667601  | 0.215480  | 0.371268  |
| 1  | 3.708595  | 0.726966  | 1.329584  |
| 6  | 4.815570  | -0.118903 | -0.280943 |
| 1  | 4.796064  | -0.634572 | -1.237916 |
| 1  | -4.519184 | -1.398675 | -0.057166 |
| 1  | 5.791819  | 0.115538  | 0.131730  |

**7a**

|    |           |           |           |
|----|-----------|-----------|-----------|
| 6  | 0.500137  | -0.172032 | 1.567110  |
| 1  | 1.500082  | -0.220313 | 1.106995  |
| 6  | -0.617156 | -0.157212 | 0.746686  |
| 1  | -1.603819 | -0.175765 | 1.212691  |
| 6  | -0.617156 | -0.157212 | -0.746686 |
| 1  | -1.603819 | -0.175765 | -1.212691 |
| 6  | 0.500137  | -0.172032 | -1.567110 |
| 1  | 1.500082  | -0.220313 | -1.106995 |
| 12 | 0.223840  | 1.773703  | 0.000000  |
| 6  | 0.500137  | -0.254755 | 3.013461  |
| 6  | 0.500137  | -0.254755 | -3.013461 |
| 6  | -0.515744 | -0.786877 | 3.729452  |
| 1  | -0.444949 | -0.866892 | 4.809207  |
| 6  | -0.515744 | -0.786877 | -3.729452 |
| 1  | -0.444949 | -0.866892 | -4.809207 |
| 1  | 1.414282  | 0.041435  | 3.521287  |
| 1  | -1.412880 | -1.195426 | 3.272124  |
| 1  | -1.412880 | -1.195426 | -3.272124 |
| 1  | 1.414282  | 0.041435  | -3.521287 |

**5**

|    |           |           |           |
|----|-----------|-----------|-----------|
| 6  | -1.468433 | -0.449239 | 0.554760  |
| 1  | -2.528941 | -0.690711 | 0.556057  |
| 1  | -1.107467 | 0.058769  | 1.467956  |
| 6  | -0.627388 | -0.928022 | -0.405738 |
| 1  | -1.037812 | -1.534011 | -1.214751 |
| 6  | 0.843620  | -0.633237 | -0.478315 |
| 1  | 1.324491  | -0.792646 | -1.446291 |
| 6  | 1.609471  | -0.237188 | 0.581316  |
| 1  | 2.672342  | -0.046816 | 0.444887  |
| 1  | 1.243738  | -0.224647 | 1.611180  |
| 12 | -0.225831 | 1.393015  | -0.244265 |

**7b**

|    |           |           |           |
|----|-----------|-----------|-----------|
| 6  | 3.287160  | -0.905586 | -0.057156 |
| 1  | 4.245276  | -1.333323 | 0.221650  |
| 1  | 3.003855  | -1.039184 | -1.116720 |
| 6  | 2.399182  | -0.447173 | 0.870427  |
| 1  | 2.700848  | -0.436502 | 1.919784  |
| 6  | 1.051555  | 0.137997  | 0.547570  |
| 1  | 0.635175  | 0.762823  | 1.338811  |
| 6  | 0.143764  | -0.632844 | -0.235218 |
| 1  | 0.587328  | -1.449113 | -0.810835 |
| 12 | 2.487384  | 1.225376  | -0.681964 |
| 6  | -1.247192 | -0.525839 | -0.345204 |
| 6  | -2.025496 | 0.341847  | 0.408830  |
| 6  | -3.446109 | 0.458419  | 0.390584  |
| 1  | -3.887611 | 1.173567  | 1.078300  |
| 6  | -4.269266 | -0.265455 | -0.418111 |
| 1  | -5.345066 | -0.127239 | -0.374334 |
| 1  | -3.907412 | -1.001666 | -1.129817 |
| 1  | -1.725462 | -1.221672 | -1.028222 |

**6**

|   |           |           |           |
|---|-----------|-----------|-----------|
| 6 | -2.295742 | -0.709757 | 0.500538  |
| 1 | -3.280286 | -1.168943 | 0.477968  |
| 1 | -2.020328 | -0.241475 | 1.462983  |
| 6 | -1.385675 | -0.906844 | -0.498809 |
| 1 | -1.687130 | -1.482978 | -1.375921 |
| 6 | -0.011366 | -0.311729 | -0.535261 |

|   |           |          |          |
|---|-----------|----------|----------|
| 1 | -1.517127 | 0.999606 | 1.114632 |
|---|-----------|----------|----------|

| <b>8a</b> |           |           |           |
|-----------|-----------|-----------|-----------|
| 6         | 1.030701  | 0.010446  | 0.767548  |
| 1         | 0.820928  | 0.096111  | 1.838257  |
| 6         | -0.033627 | -0.311748 | -0.065253 |
| 1         | 0.160999  | -0.510545 | -1.128290 |
| 6         | -1.334595 | -0.788345 | 0.475996  |
| 1         | -1.394500 | -1.009606 | 1.545432  |
| 6         | -2.465936 | -0.887577 | -0.290061 |
| 1         | -3.406287 | -1.229640 | 0.134163  |
| 1         | -2.423048 | -0.825783 | -1.386011 |
| 12        | -1.527048 | 1.341872  | -0.236047 |
| 6         | 2.392171  | 0.230172  | 0.378966  |
| 6         | 2.938477  | -0.300031 | -0.744160 |
| 1         | 3.993691  | -0.165918 | -0.961210 |
| 1         | 3.030011  | 0.748678  | 1.089638  |
| 1         | 2.379635  | -0.923259 | -1.437619 |

| <b>8b</b> |           |           |           |
|-----------|-----------|-----------|-----------|
| 6         | 2.114229  | -0.943970 | -0.606373 |
| 1         | 3.047776  | -1.487614 | -0.722523 |
| 1         | 1.588420  | -0.705786 | -1.548803 |
| 6         | 1.520636  | -0.775769 | 0.612386  |
| 1         | 2.038826  | -1.131786 | 1.505186  |
| 6         | 0.227565  | -0.053890 | 0.829994  |
| 1         | 0.055155  | 0.346264  | 1.832858  |
| 6         | -0.889710 | -0.273117 | 0.022034  |
| 1         | -0.781375 | -0.915475 | -0.857679 |
| 12        | 1.546197  | 1.314895  | -0.321270 |
| 6         | -2.197293 | 0.209183  | 0.304036  |
| 1         | -2.364519 | 0.827084  | 1.183411  |
| 6         | -3.239193 | -0.169725 | -0.482765 |
| 1         | -4.256781 | 0.134180  | -0.256390 |
| 1         | -3.099272 | -0.801879 | -1.356696 |

| <b>9a</b> |           |           |           |
|-----------|-----------|-----------|-----------|
| 6         | -1.786207 | -0.342687 | -0.125189 |
| 1         | -1.699023 | -0.807678 | -1.113556 |
| 6         | -0.623140 | 0.014696  | 0.541529  |
| 1         | -0.696790 | 0.318137  | 1.593347  |
| 6         | 0.739966  | -0.282478 | 0.011912  |
| 1         | 0.820677  | -0.982285 | -0.826596 |
| 6         | 1.892820  | 0.231530  | 0.581234  |
| 1         | 1.781223  | 0.878305  | 1.465379  |
| 12        | 0.156609  | 1.770372  | -0.559145 |
| 6         | 3.254503  | -0.098938 | 0.209674  |

|   |           |           |           |
|---|-----------|-----------|-----------|
| 6 | 3.600018  | -1.267107 | -0.372772 |
| 1 | 4.638896  | -1.487384 | -0.594355 |
| 6 | -3.101955 | -0.232818 | 0.418871  |
| 1 | -3.229985 | 0.184431  | 1.415546  |
| 6 | -4.170330 | -0.703047 | -0.270560 |
| 1 | -5.170352 | -0.672362 | 0.150048  |
| 1 | -4.068007 | -1.142444 | -1.259867 |
| 1 | 4.029113  | 0.602121  | 0.509165  |
| 1 | 2.880897  | -2.050218 | -0.597568 |

| <b>9b</b> |           |           |           |
|-----------|-----------|-----------|-----------|
| 6         | 1.298975  | 0.035779  | 0.082021  |
| 1         | 1.401575  | 0.787780  | 0.861055  |
| 6         | 0.035953  | -0.435784 | -0.259202 |
| 1         | -0.015125 | -1.206550 | -1.033331 |
| 6         | -1.185090 | -0.026744 | 0.332407  |
| 1         | -1.107537 | 0.539969  | 1.271077  |
| 6         | -2.400903 | -0.868004 | 0.206671  |
| 1         | -2.331655 | -1.774111 | -0.400918 |
| 12        | -2.718136 | 1.166554  | -0.685311 |
| 6         | 2.413642  | -0.504350 | -0.548343 |
| 1         | 2.221259  | -1.244089 | -1.327598 |
| 6         | 3.786847  | -0.214693 | -0.294792 |
| 1         | 4.516462  | -0.712264 | -0.926686 |
| 6         | 4.225799  | 0.611633  | 0.692293  |
| 1         | 3.556671  | 1.123917  | 1.377530  |
| 6         | -3.624815 | -0.506841 | 0.709482  |
| 1         | -3.715886 | 0.298960  | 1.453282  |
| 1         | -4.498197 | -1.139332 | 0.585987  |
| 1         | 5.287621  | 0.781095  | 0.840112  |

| <b>9c</b> |           |           |           |
|-----------|-----------|-----------|-----------|
| 6         | -3.089464 | 1.230677  | -0.322853 |
| 1         | -3.937643 | 1.903986  | -0.245978 |
| 1         | -2.586242 | 1.216230  | -1.306036 |
| 6         | -2.545667 | 0.616611  | 0.765701  |
| 1         | -3.030768 | 0.743860  | 1.735736  |
| 6         | -1.358747 | -0.302996 | 0.712323  |
| 1         | -1.266890 | -0.986454 | 1.560071  |
| 6         | -0.130472 | 0.165144  | 0.162805  |
| 1         | -0.156842 | 1.083375  | -0.430941 |
| 12        | -2.759936 | -1.085234 | -0.750905 |
| 6         | 1.110597  | -0.424490 | 0.375614  |
| 1         | 1.189632  | -1.328017 | 0.978034  |
| 6         | 2.263936  | 0.175910  | -0.117680 |
| 1         | 2.161627  | 1.085562  | -0.713889 |
| 6         | 3.574897  | -0.301047 | 0.120487  |
| 1         | 3.718362  | -1.202306 | 0.711106  |
| 6         | 4.647935  | 0.372920  | -0.379996 |
| 1         | 5.663677  | 0.031172  | -0.207225 |

---

|   |          |          |           |
|---|----------|----------|-----------|
| 1 | 4.526230 | 1.279027 | -0.968431 |
|---|----------|----------|-----------|

---

**10a**

---

|    |           |           |           |
|----|-----------|-----------|-----------|
| 6  | 1.752558  | -0.073163 | 0.709821  |
| 1  | 1.487573  | 0.079506  | 1.764459  |
| 6  | 0.718560  | -0.198430 | -0.202776 |
| 1  | 0.951076  | -0.423109 | -1.250020 |
| 6  | -0.718624 | -0.198279 | 0.202747  |
| 1  | -0.951143 | -0.422547 | 1.250082  |
| 6  | -1.752623 | -0.073439 | -0.709907 |
| 1  | -1.487640 | 0.078812  | -1.764598 |
| 12 | 0.000146  | 1.884909  | -0.000152 |
| 6  | 3.162561  | -0.214849 | 0.426457  |
| 6  | 3.641151  | -0.950165 | -0.601991 |
| 1  | 4.710085  | -1.068084 | -0.746027 |
| 1  | 3.854228  | 0.215365  | 1.145892  |
| 1  | 2.998182  | -1.493930 | -1.289047 |
| 6  | -3.162615 | -0.214988 | -0.426475 |
| 6  | -3.641210 | -0.949828 | 0.602317  |
| 1  | -4.710144 | -1.067683 | 0.746404  |
| 1  | -3.854283 | 0.214885  | -1.146112 |
| 1  | -2.998242 | -1.493275 | 1.289627  |

---

**10b**

---

|    |           |           |           |
|----|-----------|-----------|-----------|
| 6  | 3.175977  | -1.066745 | -0.115239 |
| 1  | 4.084836  | -1.629553 | 0.074444  |
| 1  | 2.749595  | -1.187493 | -1.127158 |
| 6  | 2.486963  | -0.439380 | 0.879822  |
| 1  | 2.908507  | -0.435692 | 1.887158  |
| 6  | 1.213456  | 0.330146  | 0.672262  |
| 1  | 0.980760  | 1.055826  | 1.455255  |
| 6  | 0.095417  | -0.312575 | 0.069185  |
| 1  | 0.274832  | -1.255558 | -0.454863 |
| 12 | 2.633935  | 1.152937  | -0.755423 |
| 6  | -1.220774 | 0.132825  | 0.145258  |
| 1  | -1.446322 | 1.055402  | 0.675306  |
| 6  | -2.230094 | -0.646717 | -0.407569 |
| 1  | -1.915634 | -1.550223 | -0.933333 |
| 6  | -3.635962 | -0.414003 | -0.362281 |
| 6  | -4.221448 | 0.610678  | 0.314679  |
| 1  | -5.300740 | 0.725660  | 0.317866  |
| 1  | -3.657728 | 1.343824  | 0.884333  |
| 1  | -4.266541 | -1.122816 | -0.890645 |

---

**11**

---

|   |          |           |           |
|---|----------|-----------|-----------|
| 6 | 0.840399 | 1.269513  | 0.683682  |
| 6 | 0.150789 | 0.408803  | 1.639291  |
| 6 | 0.150789 | -0.966906 | 1.714033  |
| 6 | 0.150789 | -0.966906 | -1.714033 |
| 6 | 0.150789 | 0.408803  | -1.639291 |

|    |           |           |           |
|----|-----------|-----------|-----------|
| 6  | 0.840399  | 1.269513  | -0.683682 |
| 1  | 1.298878  | 2.140927  | 1.153128  |
| 1  | -0.353882 | 0.943590  | 2.450644  |
| 1  | -0.314009 | -1.456376 | 2.571324  |
| 1  | -0.314009 | -1.456376 | -2.571324 |
| 1  | -0.353882 | 0.943590  | -2.450644 |
| 1  | 1.298878  | 2.140927  | -1.153128 |
| 1  | 0.836839  | -1.567867 | -1.116071 |
| 1  | 0.836839  | -1.567867 | 1.116071  |
| 12 | -1.386615 | -0.721455 | 0.000000  |

---

**12a**

---

|    |           |           |           |
|----|-----------|-----------|-----------|
| 6  | 0.885684  | -1.481116 | -0.474141 |
| 6  | -0.393127 | -1.161674 | 0.192239  |
| 6  | -1.320817 | -0.220747 | -0.264040 |
| 6  | 1.435030  | 1.766832  | -0.230159 |
| 6  | 2.274278  | 0.698113  | -0.455448 |
| 6  | 1.968428  | -0.692867 | -0.796668 |
| 1  | 1.022691  | -2.548446 | -0.655357 |
| 1  | -0.798832 | -1.966317 | 0.814771  |
| 1  | 1.860797  | 2.724824  | 0.062299  |
| 1  | 3.342294  | 0.892240  | -0.327125 |
| 1  | 2.812423  | -1.225500 | -1.231410 |
| 1  | 0.395225  | 1.780695  | -0.543805 |
| 1  | -1.046281 | 0.417336  | -1.107039 |
| 12 | 0.943387  | 0.136471  | 1.406124  |
| 6  | -2.664074 | -0.128340 | 0.197040  |
| 6  | -3.535241 | 0.712132  | -0.421333 |
| 1  | -4.580345 | 0.755848  | -0.130047 |
| 1  | -3.001705 | -0.779603 | 1.000524  |
| 1  | -3.227877 | 1.357272  | -1.241244 |

---

**12b**

---

|    |           |           |           |
|----|-----------|-----------|-----------|
| 6  | 1.580081  | -1.361072 | -0.464944 |
| 6  | 0.250274  | -1.000533 | -0.776855 |
| 6  | -0.590278 | -0.034724 | -0.195597 |
| 6  | 2.237379  | 1.708366  | -0.169458 |
| 6  | 2.560980  | 0.703726  | 0.678199  |
| 6  | 2.521926  | -0.684368 | 0.286090  |
| 1  | 1.888544  | -2.329597 | -0.852619 |
| 1  | -0.214396 | -1.630042 | -1.541814 |
| 1  | 2.421558  | 2.744102  | 0.097718  |
| 1  | 3.073928  | 0.937685  | 1.609533  |
| 1  | 3.398222  | -1.268508 | 0.574624  |
| 1  | 1.871551  | 1.513359  | -1.174317 |
| 1  | -0.144098 | 0.717396  | 0.462363  |
| 6  | -1.870730 | 0.338202  | -0.837076 |
| 12 | -2.268664 | -0.723455 | 1.090111  |
| 6  | -2.802269 | 1.156027  | -0.245027 |
| 1  | -3.735914 | 1.401476  | -0.742306 |

Electronic Supplementary Material for PCCP  
 This journal is © The Owner Societies 2008

|   |           |           |           |
|---|-----------|-----------|-----------|
| 1 | -2.542718 | 1.772336  | 0.627675  |
| 1 | -2.116894 | -0.130496 | -1.794188 |

**13**

|    |           |           |           |
|----|-----------|-----------|-----------|
| 6  | -0.607948 | 1.540393  | -0.228443 |
| 6  | 0.639184  | 0.840927  | 0.146990  |
| 6  | 1.232114  | -0.198571 | -0.567037 |
| 6  | -1.947686 | -1.488261 | -0.463691 |
| 6  | -2.490138 | -0.235553 | -0.284405 |
| 6  | -1.888972 | 1.090319  | -0.451501 |
| 1  | -0.501009 | 2.626346  | -0.222855 |
| 1  | 1.284554  | 1.399322  | 0.833380  |
| 1  | -1.046281 | 0.417336  | -1.107039 |
| 12 | 0.943387  | 0.136471  | 1.406124  |
| 6  | -2.664074 | -0.128340 | 0.197040  |
| 6  | -3.535241 | 0.712132  | -0.421333 |
| 1  | -4.580345 | 0.755848  | -0.130047 |
| 1  | -3.001705 | -0.779603 | 1.000524  |
| 1  | -3.227877 | 1.357272  | -1.241244 |

**14**

|   |           |           |           |
|---|-----------|-----------|-----------|
| 6 | 2.623604  | -1.035084 | -0.339631 |
| 6 | -2.072796 | -0.965390 | 0.980118  |
| 6 | -2.185728 | -0.548424 | -0.318906 |
| 6 | 2.092906  | 0.220050  | -0.315832 |
| 6 | -1.620657 | 0.681973  | -0.927727 |

|    |           |           |           |
|----|-----------|-----------|-----------|
| 1  | -2.557448 | -2.366707 | -0.259854 |
| 1  | -3.529130 | -0.205656 | 0.054922  |
| 1  | -2.624965 | 1.873632  | -0.625488 |
| 1  | -1.027313 | -1.660104 | -1.015229 |
| 1  | 0.666123  | -0.635851 | -1.391329 |
| 12 | -0.762666 | -0.454955 | 1.300011  |
| 6  | 2.576225  | -0.688955 | -0.409999 |
| 6  | 3.585339  | 0.037790  | 0.129830  |
| 1  | 4.595033  | -0.359897 | 0.157637  |
| 1  | 2.800008  | -1.651190 | -0.863239 |
| 1  | 3.457437  | 1.051035  | 0.501458  |

|    |           |           |           |
|----|-----------|-----------|-----------|
| 6  | 1.392877  | 0.767841  | 0.885888  |
| 6  | 0.145061  | 1.308251  | 0.814741  |
| 1  | 3.143039  | -1.409070 | -1.219528 |
| 1  | -2.554154 | -1.890468 | 1.291199  |
| 1  | -2.765063 | -1.175050 | -1.000608 |
| 1  | 2.179629  | 0.857979  | -1.199850 |
| 1  | 1.904821  | 0.704422  | 1.847718  |
| 1  | -2.052654 | 0.950363  | -1.890818 |
| 1  | -0.321562 | 1.691134  | 1.725188  |
| 6  | -0.602766 | 1.467039  | -0.464871 |
| 1  | -0.312519 | 2.319500  | -1.083779 |
| 1  | 2.665445  | -1.658681 | 0.558971  |
| 1  | -1.656011 | -0.345854 | 1.773530  |
| 12 | 0.094502  | -0.951817 | -0.223726 |

**Table S6:** The MP2(FULL)/6-31G\* optimized cartesian coordinates of the cyclic Mg<sup>2+</sup> complexes considered in the study.

| <b>15</b> |           |           |           |
|-----------|-----------|-----------|-----------|
| 6         | 0.682695  | 0.806082  | -0.607587 |
| 6         | -0.682695 | 0.806082  | -0.607587 |
| 6         | -0.682695 | -0.806082 | -0.607587 |
| 6         | 0.682695  | -0.806082 | -0.607587 |
| 1         | 1.440815  | 1.549222  | -0.853267 |
| 1         | 1.440815  | -1.549222 | -0.853267 |
| 1         | -1.440815 | 1.549222  | -0.853267 |
| 1         | -1.440815 | -1.549222 | -0.853267 |
| 12        | 0.000000  | 0.000000  | 1.499596  |

  

| <b>16</b> |           |           |           |
|-----------|-----------|-----------|-----------|
| 6         | 0.000000  | 1.417241  | -0.426610 |
| 6         | 1.227367  | 0.708620  | -0.426610 |
| 6         | 1.227367  | -0.708620 | -0.426610 |
| 6         | 0.000000  | -1.417241 | -0.426610 |
| 6         | -1.227367 | -0.708620 | -0.426610 |
| 6         | -1.227367 | 0.708620  | -0.426610 |
| 1         | 0.000000  | 2.505976  | -0.466254 |
| 1         | 2.170239  | 1.252988  | -0.466254 |
| 1         | 2.170239  | -1.252988 | -0.466254 |
| 1         | 0.000000  | -2.505976 | -0.466254 |
| 1         | -2.170239 | -1.252988 | -0.466254 |
| 1         | -2.170239 | 1.252988  | -0.466254 |
| 12        | 0.000000  | 0.000000  | 1.512958  |

  

| <b>17</b> |           |           |           |
|-----------|-----------|-----------|-----------|
| 6         | -0.444058 | 0.531748  | 1.569718  |
| 6         | 0.491864  | -0.485701 | 1.570444  |
| 6         | 0.491864  | -1.652131 | 0.677832  |
| 6         | -1.607458 | 0.625867  | 0.677613  |
| 6         | 0.491864  | -1.652131 | -0.677832 |
| 6         | -1.607458 | 0.625867  | -0.677613 |
| 6         | -0.444058 | 0.531748  | -1.569718 |

  

| <b>18</b> |           |           |           |
|-----------|-----------|-----------|-----------|
| 6         | 0.012306  | 2.651570  | 0.707549  |
| 6         | 0.088695  | 1.470400  | 1.422991  |
| 6         | 0.207152  | 0.238754  | 0.732012  |
| 6         | 0.207152  | 0.238754  | -0.732012 |
| 6         | 0.088695  | 1.470400  | -1.422991 |
| 6         | 0.012306  | 2.651570  | -0.707549 |
| 1         | 0.438510  | -1.015905 | 2.510338  |
| 1         | -0.040858 | 3.597329  | 1.240974  |
| 1         | 0.102735  | 1.480694  | 2.511118  |
| 6         | 0.393556  | -1.013718 | 1.420777  |
| 6         | 0.393556  | -1.013718 | -1.420777 |
| 1         | 0.102735  | 1.480694  | -2.511118 |
| 1         | -0.040858 | 3.597329  | -1.240974 |
| 6         | 0.564548  | -2.212713 | -0.718217 |
| 6         | 0.564548  | -2.212713 | 0.718217  |
| 1         | 0.438510  | -1.015905 | -2.510338 |
| 1         | 0.741857  | -3.140854 | -1.259033 |
| 1         | 0.741857  | -3.140854 | 1.259033  |
| 12        | -1.473297 | -1.287837 | 0.000000  |

  

| <b>19a</b> |           |           |           |
|------------|-----------|-----------|-----------|
| 1          | -0.432892 | 1.212243  | 2.428042  |
| 1          | 1.169859  | -0.530495 | 2.429662  |
| 1          | 0.615634  | -2.607618 | 1.188805  |
| 1          | -2.549506 | 0.824667  | 1.189914  |
| 1          | -2.549506 | 0.824667  | -1.189914 |
| 1          | 0.615634  | -2.607618 | -1.188805 |
| 1          | -0.432892 | 1.212243  | -2.428042 |
| 6          | 0.491864  | -0.485701 | -1.570444 |
| 1          | 1.169859  | -0.530495 | -2.429662 |
| 12         | 1.267272  | 1.163752  | 0.000000  |



|    |           |           |           |
|----|-----------|-----------|-----------|
| 6  | -0.031743 | 3.950089  | 0.709917  |
| 6  | 0.005783  | 2.768996  | 1.418591  |
| 6  | 0.053234  | 1.531578  | 0.728345  |
| 6  | 0.053234  | 1.531578  | -0.728345 |
| 6  | 0.005783  | 2.768996  | -1.418591 |
| 6  | -0.031743 | 3.950089  | -0.709917 |
| 6  | 0.111802  | 0.315508  | 1.422258  |
| 6  | 0.111802  | 0.315508  | -1.422258 |
| 6  | 0.208801  | -0.906107 | -0.739384 |
| 6  | 0.208801  | -0.906107 | 0.739384  |
| 6  | 0.388133  | -2.166101 | 1.423744  |
| 1  | 0.439278  | -2.170348 | 2.512975  |
| 6  | 0.528620  | -3.365396 | 0.721808  |
| 6  | 0.528620  | -3.365396 | -0.721808 |
| 6  | 0.388133  | -2.166101 | -1.423744 |
| 1  | 0.125380  | 0.319870  | 2.512594  |
| 1  | -0.060052 | 4.897091  | 1.242291  |
| 1  | 0.010543  | 2.776983  | 2.506146  |
| 1  | 0.010543  | 2.776983  | -2.506146 |
| 1  | -0.060052 | 4.897091  | -1.242291 |
| 1  | 0.125380  | 0.319870  | -2.512594 |
| 1  | 0.691199  | -4.296615 | 1.260773  |
| 1  | 0.691199  | -4.296615 | -1.260773 |
| 1  | 0.439278  | -2.170348 | -2.512975 |
| 12 | -1.465688 | -2.383066 | 0.000000  |

**19b**

|   |           |           |           |
|---|-----------|-----------|-----------|
| 6 | -3.667942 | 0.711606  | -0.310566 |
| 6 | -2.495672 | 1.425204  | -0.214086 |
| 6 | -1.250206 | 0.734968  | -0.149295 |
| 6 | -1.250206 | -0.734968 | -0.149295 |
| 6 | -2.495672 | -1.425204 | -0.214086 |
| 6 | -3.667942 | -0.711606 | -0.310566 |
| 6 | 0.000000  | 1.419651  | -0.127923 |
| 6 | 0.000000  | -1.419651 | -0.127923 |
| 6 | 1.250206  | -0.734968 | -0.149295 |
| 6 | 1.250206  | 0.734968  | -0.149295 |
| 6 | 2.495672  | 1.425204  | -0.214086 |
| 1 | 2.501858  | 2.513141  | -0.231490 |
| 6 | 3.667942  | 0.711606  | -0.310566 |
| 6 | 3.667942  | -0.711606 | -0.310566 |
| 6 | 2.495672  | -1.425204 | -0.214086 |
| 1 | 0.000000  | 2.510775  | -0.163215 |
| 1 | -4.612263 | 1.242750  | -0.397377 |
| 1 | -2.501858 | 2.513141  | -0.231490 |
| 1 | -2.501858 | -2.513141 | -0.231490 |
| 1 | -4.612263 | -1.242750 | -0.397377 |
| 1 | 0.000000  | -2.510775 | -0.163215 |
| 1 | 4.612263  | 1.242750  | -0.397377 |
| 1 | 4.612263  | -1.242750 | -0.397377 |
| 1 | 2.501858  | -2.513141 | -0.231490 |

|            |           |           |           |
|------------|-----------|-----------|-----------|
| 12         | 0.000000  | 0.000000  | 1.712641  |
| <b>20a</b> |           |           |           |
| 6          | 3.809120  | -0.345267 | 0.054036  |
| 6          | 3.120475  | 0.853812  | 0.041875  |
| 6          | 1.711052  | 0.865557  | -0.010966 |
| 6          | 0.996404  | -0.375800 | -0.113934 |
| 6          | 1.725411  | -1.585794 | -0.079407 |
| 6          | 3.107783  | -1.564762 | -0.020815 |
| 6          | 1.010731  | 2.105366  | -0.054360 |
| 6          | -0.440590 | -0.323498 | -0.189643 |
| 6          | -1.115061 | 0.977468  | -0.223982 |
| 6          | -0.357747 | 2.174115  | -0.114728 |
| 6          | -2.543768 | 1.018691  | -0.386508 |
| 1          | -3.033905 | 1.991396  | -0.434169 |
| 6          | -3.305791 | -0.148260 | -0.545508 |
| 6          | -2.651753 | -1.417709 | -0.540115 |
| 6          | -1.259252 | -1.494398 | -0.370023 |
| 1          | 1.587942  | 3.027470  | -0.009701 |
| 1          | 4.894764  | -0.349134 | 0.097560  |
| 1          | 3.657317  | 1.798078  | 0.094700  |
| 1          | 1.230743  | -2.550053 | -0.150843 |
| 1          | 3.657449  | -2.502034 | -0.017425 |
| 1          | -0.866917 | 3.134471  | -0.156805 |
| 1          | -4.379056 | -0.084229 | -0.714752 |
| 1          | -3.225882 | -2.327275 | -0.706709 |
| 1          | -0.793305 | -2.475750 | -0.410040 |
| 12         | -2.130936 | -0.341672 | 1.477721  |

**20b**

|   |           |           |           |
|---|-----------|-----------|-----------|
| 6 | -0.422432 | -0.227895 | 3.572983  |
| 6 | 0.761696  | -0.308288 | 2.863336  |
| 6 | 0.746950  | -0.257661 | 1.447936  |
| 6 | -0.511233 | -0.095605 | 0.740076  |
| 6 | -1.693509 | 0.017958  | 1.509607  |
| 6 | -1.645031 | -0.064571 | 2.892782  |
| 6 | 1.976658  | -0.427876 | 0.692224  |
| 6 | -0.511233 | -0.095605 | -0.740076 |
| 6 | 0.746950  | -0.257661 | -1.447936 |
| 6 | 1.976658  | -0.427876 | -0.692224 |
| 6 | 0.761696  | -0.308288 | -2.863336 |
| 1 | 1.709541  | -0.446135 | -3.380146 |
| 6 | -0.422432 | -0.227895 | -3.572983 |
| 6 | -1.645031 | -0.064571 | -2.892782 |
| 6 | -1.693509 | 0.017958  | -1.509607 |
| 1 | 2.906998  | -0.592374 | 1.235665  |
| 1 | -0.410750 | -0.298806 | 4.657291  |
| 1 | 1.709541  | -0.446135 | 3.380146  |
| 1 | -2.659133 | 0.129123  | 1.026980  |
| 1 | -2.570692 | -0.006959 | 3.459701  |
| 1 | 2.906998  | -0.592374 | -1.235665 |
| 1 | -0.410750 | -0.298806 | -4.657291 |

Electronic Supplementary Material for PCCP  
This journal is © The Owner Societies 2008

|    |           |           |           |
|----|-----------|-----------|-----------|
| 1  | -2.570692 | -0.006959 | -3.459701 |
| 1  | -2.659133 | 0.129123  | -1.026980 |
| 12 | 0.957572  | 1.566462  | 0.000000  |

**21a**

|    |           |           |           |
|----|-----------|-----------|-----------|
| 6  | -4.544941 | -0.722677 | -0.504511 |
| 6  | -3.343366 | -1.423581 | -0.381601 |
| 6  | -2.081693 | -0.742273 | -0.205967 |
| 6  | -2.081589 | 0.742757  | -0.206101 |
| 6  | -3.343397 | 1.424205  | -0.379228 |
| 6  | -4.545072 | 0.723389  | -0.502753 |
| 6  | -0.859779 | -1.424610 | -0.120305 |
| 6  | -0.859679 | 1.424964  | -0.120331 |
| 6  | 0.359347  | 0.735302  | -0.069028 |
| 6  | 0.359276  | -0.735046 | -0.068567 |
| 6  | 1.584036  | -1.418081 | -0.031245 |
| 1  | 1.588746  | -2.507930 | -0.034743 |
| 6  | 2.799233  | -0.727871 | -0.006859 |
| 6  | 2.799303  | 0.727876  | -0.007128 |
| 6  | 1.584170  | 1.418199  | -0.031599 |
| 1  | -0.858335 | -2.515436 | -0.135230 |
| 1  | -5.477513 | -1.261537 | -0.657155 |
| 1  | -3.348098 | -2.512731 | -0.434661 |
| 1  | -3.348317 | 2.513443  | -0.430493 |
| 1  | -5.477727 | 1.262498  | -0.654007 |
| 1  | -0.858170 | 2.515793  | -0.134991 |
| 1  | 1.588999  | 2.508046  | -0.035490 |
| 6  | 4.041233  | -1.417191 | 0.016342  |
| 6  | 4.041365  | 1.417075  | 0.015948  |
| 6  | 5.220943  | -0.711537 | 0.036467  |
| 6  | 5.221013  | 0.711319  | 0.036269  |
| 1  | 4.046702  | -2.504761 | 0.013981  |
| 1  | 4.046941  | 2.504645  | 0.013276  |
| 1  | 6.168488  | 1.243166  | 0.050942  |
| 1  | 6.168367  | -1.243469 | 0.051278  |
| 12 | -3.528541 | -0.001254 | 1.464040  |

**21b**

|   |          |           |           |
|---|----------|-----------|-----------|
| 6 | 0.206062 | 5.003540  | 0.711222  |
| 6 | 0.146598 | 3.825155  | 1.418304  |
| 6 | 0.089860 | 2.584979  | 0.728443  |
| 6 | 0.089860 | 2.584979  | -0.728443 |
| 6 | 0.146598 | 3.825155  | -1.418304 |
| 6 | 0.206062 | 5.003540  | -0.711222 |
| 6 | 0.043793 | 1.371997  | 1.423454  |
| 6 | 0.043793 | 1.371997  | -1.423454 |
| 6 | 0.040445 | 0.141411  | -0.742145 |
| 6 | 0.040445 | 0.141411  | 0.742145  |
| 6 | 0.083633 | -1.118773 | 1.422632  |
| 1 | 0.123835 | -1.120829 | 2.513596  |
| 6 | 0.164535 | -2.360264 | 0.736568  |
| 6 | 0.164535 | -2.360264 | -0.736568 |

|    |           |           |           |
|----|-----------|-----------|-----------|
| 6  | 0.083633  | -1.118773 | -1.422632 |
| 1  | 0.058856  | 1.376339  | 2.513588  |
| 1  | 0.255997  | 5.949625  | 1.243509  |
| 1  | 0.152532  | 3.831877  | 2.505869  |
| 1  | 0.152532  | 3.831877  | -2.505869 |
| 1  | 0.255997  | 5.949625  | -1.243509 |
| 1  | 0.058856  | 1.376339  | -2.513588 |
| 1  | 0.123835  | -1.120829 | -2.513596 |
| 6  | 0.287034  | -3.606327 | 1.425214  |
| 6  | 0.287034  | -3.606327 | -1.425214 |
| 6  | 0.432674  | -4.771040 | 0.713324  |
| 6  | 0.432674  | -4.771040 | -0.713324 |
| 1  | 0.306177  | -3.611328 | 2.513089  |
| 1  | 0.306177  | -3.611328 | -2.513089 |
| 1  | 0.560387  | -5.710646 | -1.244269 |
| 1  | 0.560387  | -5.710646 | 1.244269  |
| 12 | -1.737600 | -1.189851 | 0.000000  |

**Table S7:** The total energy of the Li<sup>+</sup> and Mg<sup>2+</sup> complexes of the acyclic systems at the MP2(FULL)/6-311++G\*\* level.

| System     | BSSE Corrected  |                  | BSSE Uncorrected |                  |
|------------|-----------------|------------------|------------------|------------------|
|            | Li <sup>+</sup> | Mg <sup>2+</sup> | Li <sup>+</sup>  | Mg <sup>2+</sup> |
| <b>1</b>   | -85.663628      | -277.442298      | -85.665914       | -277.445283      |
| <b>2</b>   | -162.892459     | -354.695861      | -162.896130      | -354.700730      |
| <b>3a</b>  | -240.113087     | -431.928143      | -240.116923      | -431.932611      |
| <b>3b</b>  | -240.117190     | -431.940980      | -240.121064      | -431.946230      |
| <b>4a</b>  | -317.341209     | -509.174861      | -317.345158      | -509.180196      |
| <b>4b</b>  | -317.341726     | -509.185597      | -317.345523      | -509.190768      |
| <b>5</b>   | -162.888946     | -354.692682      | -162.893720      | -354.698460      |
| <b>6</b>   | -240.109359     | -431.930320      | -240.113691      | -431.935649      |
| <b>7a</b>  | -317.328160     | -509.157804      | -317.332760      | -509.164081      |
| <b>7b</b>  | -317.328814     | -509.167967      | -317.333400      | -509.173002      |
| <b>8a</b>  | -240.112657     | -431.933047      | -240.116421      | -431.938228      |
| <b>8b</b>  | -240.114648     | -431.938390      | -240.119239      | -431.943719      |
| <b>9a</b>  | -317.336775     | -509.168862      | -317.340767      | -509.174261      |
| <b>9b</b>  | -317.337081     | -509.178409      | -317.340982      | -509.183573      |
| <b>9c</b>  | -317.339578     | -509.183377      | -317.344238      | -509.188450      |
| <b>10a</b> | -317.332341     | -509.162420      | -317.336193      | -509.167735      |
| <b>10b</b> | -317.334867     | -509.176317      | -317.339435      | -509.181410      |
| <b>11</b>  | -240.111905     | -431.951234      | -240.117574      | -431.957640      |
| <b>12a</b> | -317.336808     | -509.190804      | -317.342737      | -509.198185      |
| <b>12b</b> | -317.326939     | -509.158163      | -317.330830      | -509.163488      |
| <b>13</b>  | -317.334576     | -509.182917      | -317.340463      | -509.190246      |
| <b>14</b>  | -317.341851     | -509.202400      | -317.348873      | -509.211833      |

**Table S8:** The total energy of the Li<sup>+</sup> and Mg<sup>2+</sup> complexes of the cyclic systems at the MP2(FULL)/6-311++G\*\* level.

| System     | BSSE Corrected  |                  | BSSE Uncorrected |                  |
|------------|-----------------|------------------|------------------|------------------|
|            | Li <sup>+</sup> | Mg <sup>2+</sup> | Li <sup>+</sup>  | Mg <sup>2+</sup> |
| <b>15</b>  | -161.602512     | -353.402099      | -161.606400      | -353.407283      |
| <b>16</b>  | -239.002443     | -430.819605      | -239.009222      | -430.828269      |
| <b>17</b>  | -316.155645     | -508.003180      | -316.161035      | -508.010041      |
| <b>18</b>  | -392.305620     | -584.143739      | -392.313075      | -584.153489      |
| <b>19a</b> | -545.601830     | -737.455092      | -545.609424      | -737.464886      |
| <b>19b</b> | -545.600820     | -737.453110      | -545.609168      | -737.464097      |
| <b>20a</b> | -545.613806     | -737.462800      | -545.620874      | -737.472364      |
| <b>20b</b> | -545.610852     | -737.464838      | -545.618817      | -737.475427      |
| <b>21a</b> | -698.895035     | -890.758861      | -698.902511      | -890.768745      |
| <b>21b</b> | -698.894278     | -890.758516      | -698.902805      | -890.769748      |

**Table S9:** The MP2(FULL)/cc-pVDZ //MP2(FULL)/6-31G\* charges (in amu) on the Li<sup>+</sup> and Mg<sup>2+</sup> ions in the various acyclic complexes considered in the study.

|            | Li <sup>+</sup> |       | Mg <sup>2+</sup> |       |
|------------|-----------------|-------|------------------|-------|
|            | Mulliken        | NPA   | Mulliken         | NPA   |
| <b>1</b>   | 0.681           | 0.971 | 1.381            | 1.822 |
| <b>2</b>   | 0.590           | 0.967 | 1.187            | 1.840 |
| <b>3a</b>  | 0.639           | 0.974 | 1.238            | 1.725 |
| <b>3b</b>  | 0.578           | 0.966 | 1.135            | 1.831 |
| <b>4a</b>  | 0.583           | 0.967 | 1.151            | 1.802 |
| <b>4b</b>  | 0.559           | 0.964 | 1.058            | 1.795 |
| <b>5</b>   | 0.536           | 0.966 | 1.158            | 1.858 |
| <b>6</b>   | 0.534           | 0.967 | 1.133            | 1.836 |
| <b>7a</b>  | 0.536           | 0.968 | 1.121            | 1.846 |
| <b>7b</b>  | 0.513           | 0.965 | 1.061            | 1.763 |
| <b>8a</b>  | 0.579           | 0.967 | 1.151            | 1.834 |
| <b>8b</b>  | 0.534           | 0.966 | 1.128            | 1.828 |
| <b>9a</b>  | 0.581           | 0.967 | 1.147            | 1.813 |
| <b>9b</b>  | 0.564           | 0.964 | 1.062            | 1.795 |
| <b>9c</b>  | 0.516           | 0.965 | 1.061            | 1.756 |
| <b>10a</b> | 0.580           | 0.968 | 1.158            | 1.817 |
| <b>10b</b> | 0.520           | 0.965 | 1.063            | 1.761 |
| <b>11</b>  | 0.430           | 0.943 | 0.996            | 1.713 |
| <b>12a</b> | 0.426           | 0.946 | 0.944            | 1.742 |
| <b>12b</b> | 0.565           | 0.966 | 1.097            | 1.814 |
| <b>13</b>  | 0.426           | 0.929 | 0.950            | 1.744 |
| <b>14</b>  | 0.299           | 0.924 | 0.751            | 1.773 |

**Table S10:** The MP2(FULL)/cc-pVDZ //MP2(FULL)/6-31G\* charges (in amu) on the Li<sup>+</sup> and Mg<sup>2+</sup> ions in the various cyclic complexes considered in the study.

|            | Li <sup>+</sup> |       | Mg <sup>2+</sup> |       |
|------------|-----------------|-------|------------------|-------|
|            | Mulliken        | NPA   | Mulliken         | NPA   |
| <b>15</b>  | 0.603           | 0.969 | 1.256            | 1.891 |
| <b>16</b>  | 0.482           | 0.966 | 1.064            | 1.880 |
| <b>17</b>  | 0.476           | 0.941 | 1.019            | 1.678 |
| <b>18</b>  | 0.499           | 0.967 | 1.040            | 1.877 |
| <b>19a</b> | 0.489           | 0.966 | 1.007            | 1.871 |
| <b>19b</b> | 0.521           | 0.969 | 1.039            | 1.876 |
| <b>20a</b> | 0.495           | 0.967 | 1.017            | 1.866 |
| <b>20b</b> | 0.524           | 0.970 | 1.036            | 1.880 |
| <b>21a</b> | 0.480           | 0.966 | 0.982            | 1.867 |
| <b>21b</b> | 0.515           | 0.969 | 1.015            | 1.870 |

Electronic Supplementary Material for PCCP  
This journal is © The Owner Societies 2008
